# Supplementary material
Source: publisher site journal article supplement (https://www.dovepress.com/article/274165)
Supplement: Supplementary file 1 [file get_supplementary_file.php]

**SUPPLEMENTAL MATERIAL**

**Supplemental Table. Cronbach’s α Values and Shapiro-Wilk Tests of Normality for Self-Report Clinical Measures**

| **Clinical Rating Scale** | **Cronbach’s α** | | **Shapiro-Wilk Test of Normality** | |
| --- | --- | --- | --- | --- |
| Patients | Controls | Patients | Controls |
| SGI | 0.97 | 0.92 | 0.97,  p=0.45 | 0.95,  p=0.10 |
| SPQ | 0.92 | - | 0.98,  p=0.76 | - |
| DOCS | 0.95 | 0.68 | 0.94,  p<0.05 | 0.97,  p=0.49 |
| ASRS-V | 0.73 | 0.50 | 0.96,  p=0.29 | 0.97,  p=0.36 |
| GAD-7 | 0.91 | 0.85 | 0.94,  p=0.08 | 0.86,  p<0.05 |
| PHQ-9 | 0.85 | 0.64 | 0.95,  p=0.10 | 0.92,  p<0.05 |
| PUTS | 0.75^ | - | 0.97,  p=0.53 | - |

^ Item 10 removed from internal reliability analysis, as discussed in Methods
